# Supplementary material
Source: PubMed Central journal article supplement (PMC4167820)
Supplement: NIHMS614696-supplement-1.pdf [file NIHMS614696-supplement-1.pdf]

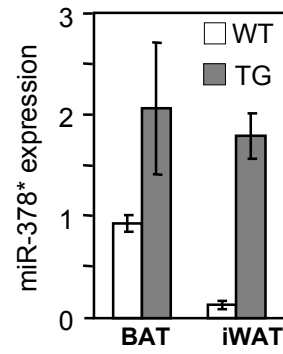

**Supplementary Figure 1.** miR-378\* transgene expression in fat tissues.  $n=2$  mice per group (10-week-old male mice).

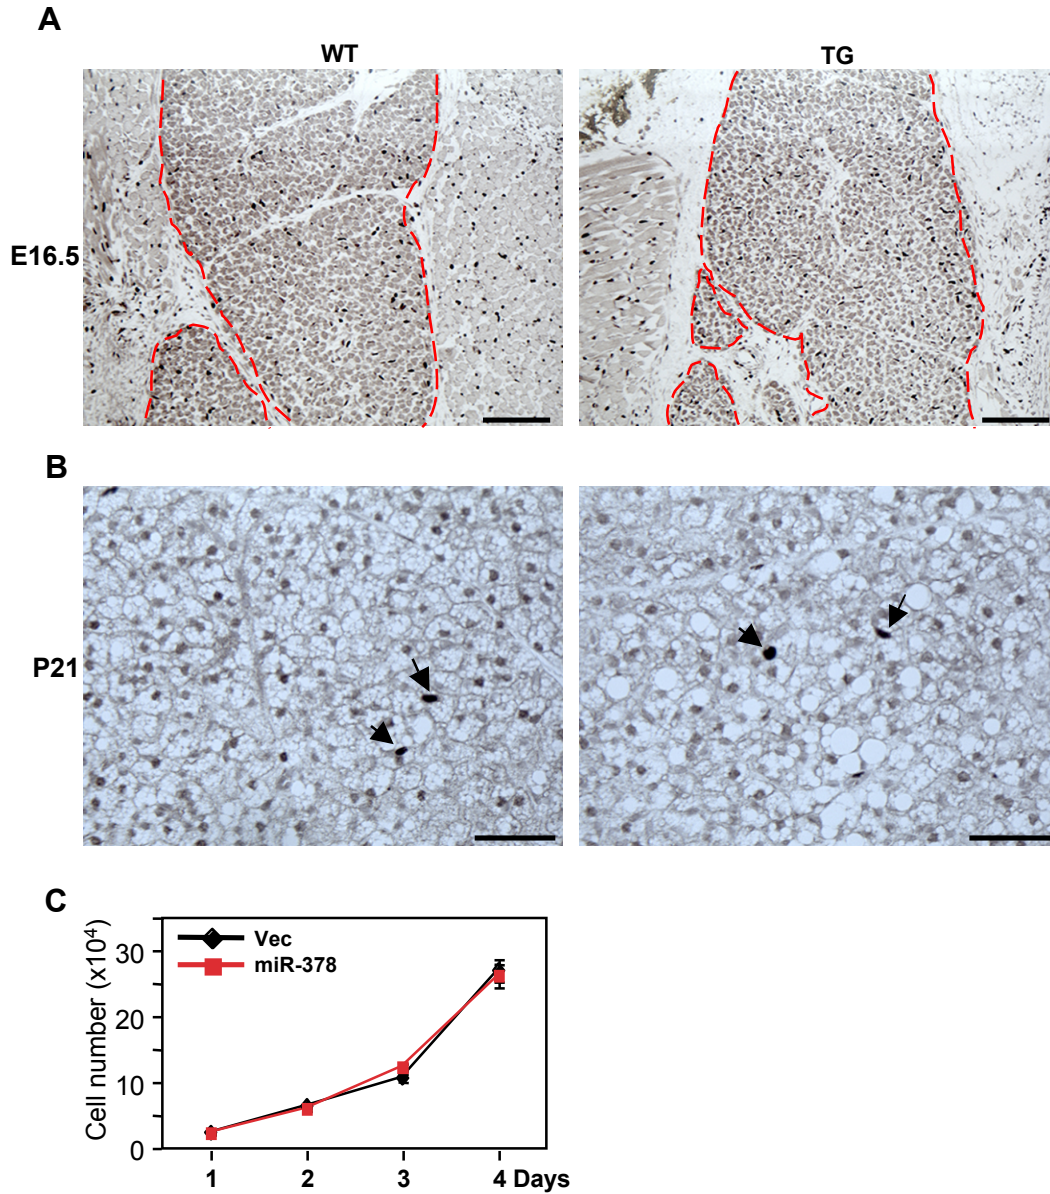

**Supplementary Figure 2.** (A and B) Ki67 immunohistochemical staining (dark brown, and indicated by arrows in B) of BAT at embryonic E16.5 and postnatal 21 day (P21). Red lines define brown fat. Scale bar, 100  $\mu$ m. (C) Overexpression of miR-378 in immortalized brown preadipocytes does not affect cell proliferation. Brown preadipocytes overexpressing miR-378 or control cells were plated in 24-well plates at  $4.8 \times 10^4$  per well. Cells were trypsinized and counted on a hemocytometer every 24 hr.  $n=4$ .

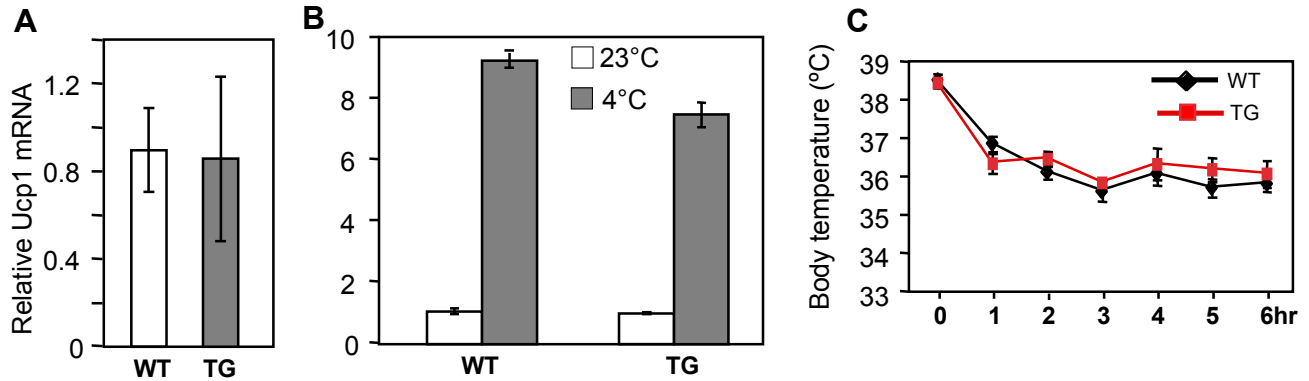

**Supplementary Figure 3.** (A) Levels of *Ucp1* mRNA in gonadal WAT from mice maintained at 23°C.  $n=4-6$  mice per group (10-week-old male mice). (B) *Ucp1* expression is induced in BAT of both WT and TG mice after cold exposure for 6 hr.  $n=3-6$  mice per group (10-week-old male mice). (C) Body temperature was measured during cold challenge.  $n=5-10$  mice per group (12-week-old male mice).

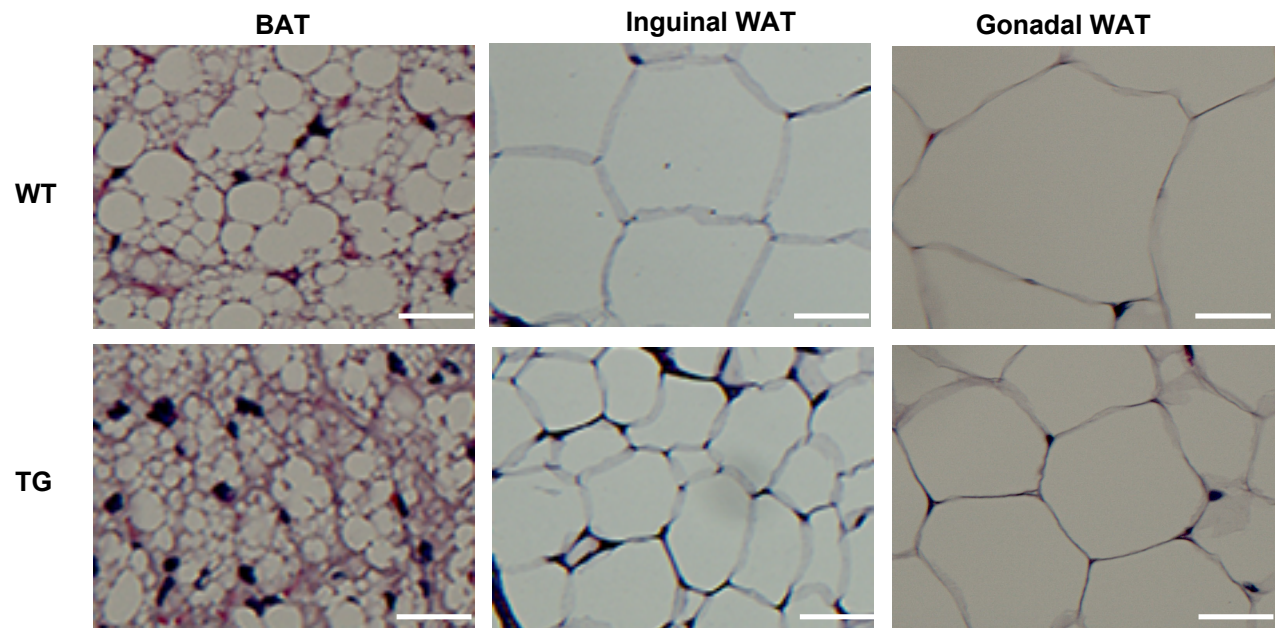

**Supplementary Figure 4.** H&E-stained histological sections of fat pads from TG and WT mice after 13 week of HFD. Scale bar, 50  $\mu$ m.

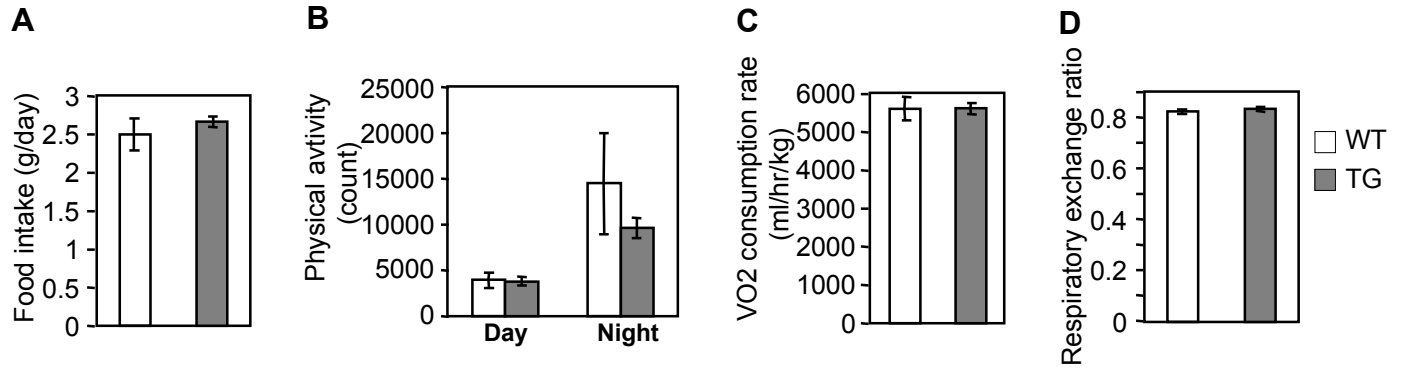

**Supplementary Figure 5.** Metabolic cage studies of miR-378 transgenic (TG) and wild type (WT) mice with a 3-day HFD. **(A)** WT and TG mice consumed similar amount of high fat diet daily measured with metabolic cages. **(B)** Physical activity. **(C)** Oxygen consumption rate normalized with lean mass. **(D)** Respiratory exchange ratio.  $n=5$  mice per group (4-month-old female mice). Note, similar results were obtained on a normal chow.

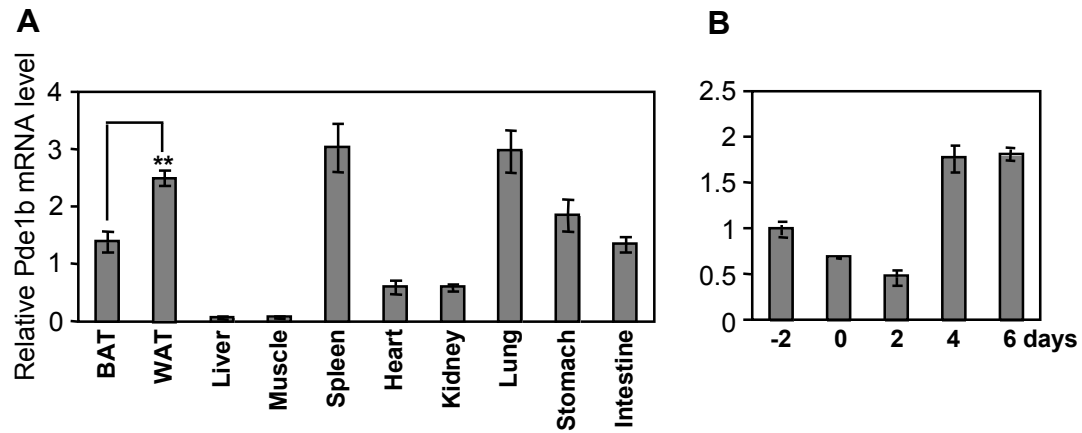

**Supplementary Figure 6.** (A) *Pde1b* expression in different tissues ( $n=4$ , 10-week-old male mice). \*\* $P=0.004$  (two-tailed Student's  $t$ -test). (B) *Pde1b* expression during brown adipogenesis.

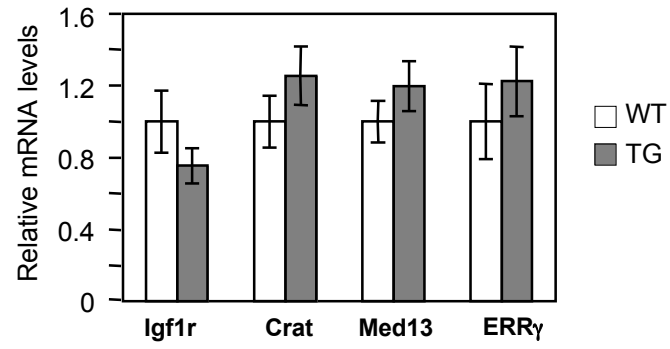

**Supplementary Figure 7.** Expression of other known miR-378/378\* targets in BAT of miR-378 transgenic mice.  $n=6$  mice per group (9-week-old male mice).

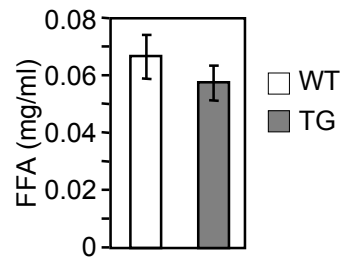

**Supplementary Figure 8.** Serum free fatty acids level after 13-week high fat diet feeding.  $n=6$  mice per group.



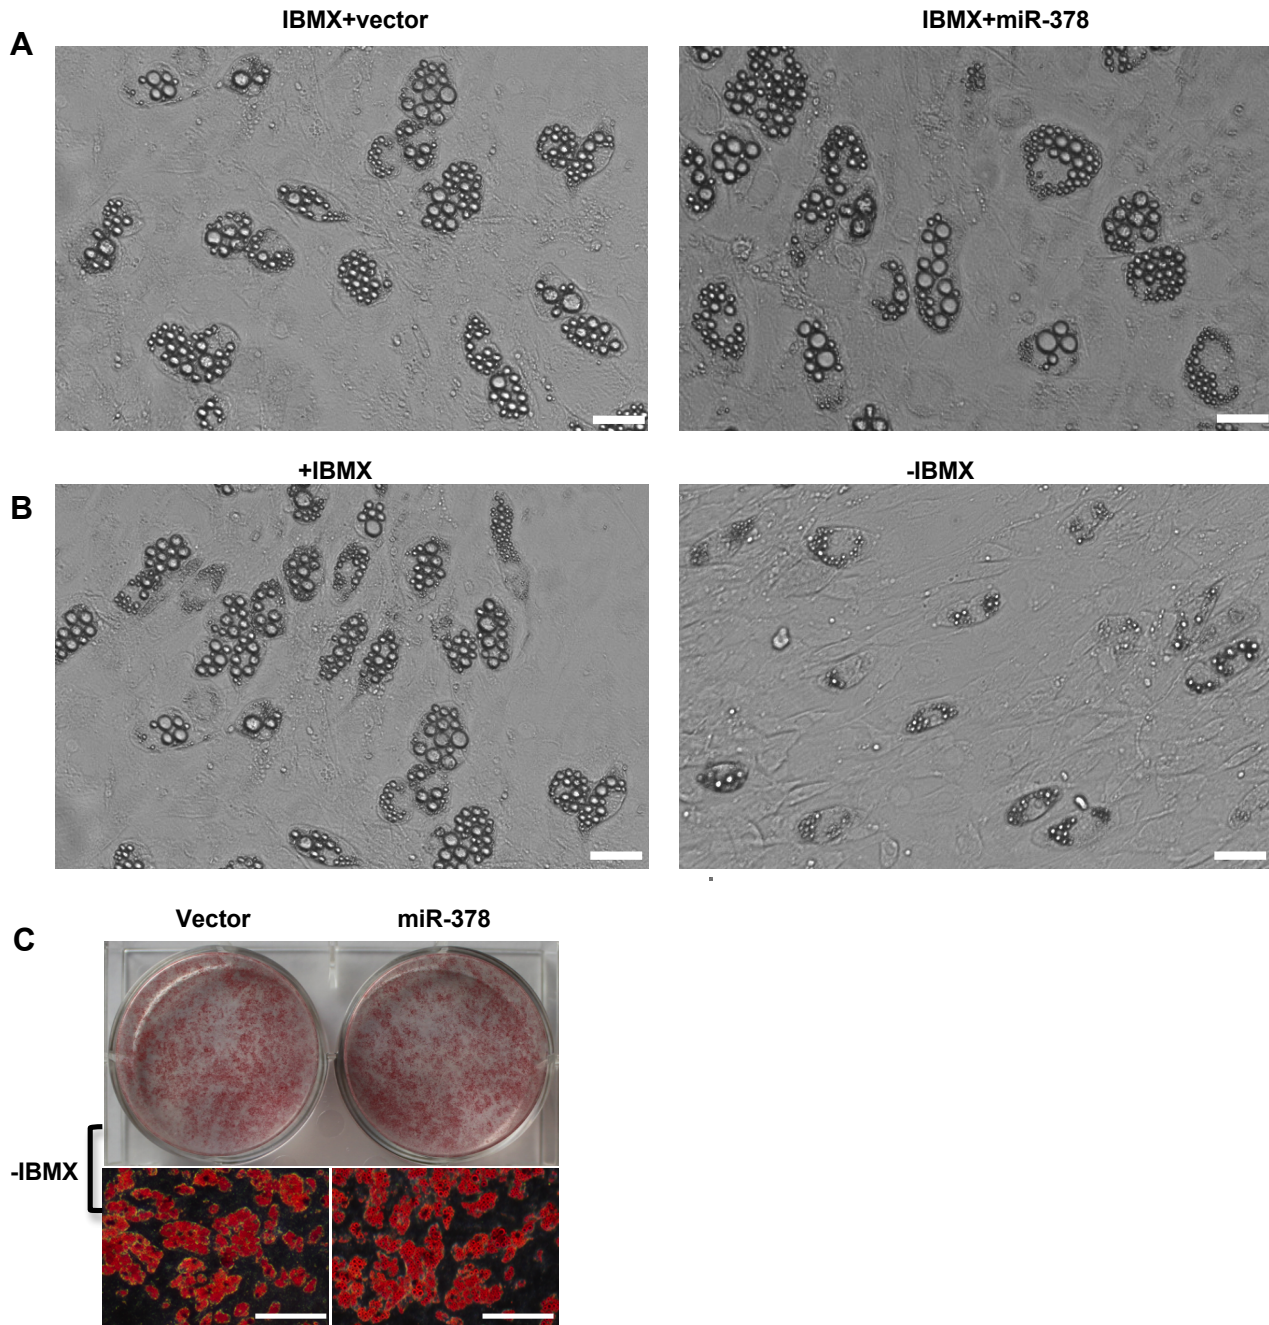

**Supplementary Figure 9.** (A) Ectopic expression of miR378/378\* has little stimulatory effect on the adipogenesis of C3H10T1/2 cells in the presence of IBMX. Scale bar, 50  $\mu\text{m}$ . (B) Removal of IBMX abolishes adipogenesis of C3H10T1/2 cells. Scale bar, 50  $\mu\text{m}$ . (C) Overexpression of miR-378/378\* does not affect the adipogenesis of iWAT preadipocytes in the absence of IBMX. Scale bar, 50  $\mu\text{m}$ .

**Supplementary Table 1 Gene full names and sequences of primers used in this study.**

| Gene full name |                                                                            | Sequences for QPCR assays and shRNA target                  |
|----------------|----------------------------------------------------------------------------|-------------------------------------------------------------|
|                |                                                                            | Primers used for real-time QPCR                             |
| Ucp1           | Uncoupling protein 1<br>(mitochondrial, proton carrier)                    | F: GGATTGGCCTCTACGACTCA<br>R: TGCCACACCTCCAGTCATTA          |
| Pgc-1 $\alpha$ | Peroxisome proliferative activated<br>receptor, gamma, coactivator 1 alpha | F: AACCACACCCACAGGATCAGA<br>R: TCTTCGCTTTATTGCTCCATGA       |
| Pgc-1 $\beta$  | Peroxisome proliferative activated<br>receptor, gamma, coactivator 1 beta  | F: CCGAGCTCTTCCAGATTGACA<br>R: CGTAAGCGCAGCCAAGAGA          |
| Prdm16         | PR domain containing 16                                                    | F: CAGCACGGTGAAGCCATTC<br>R: GCGTGCATCCGCTTGTG              |
| Cox7a1         | Cytochrome c oxidase subunit VIIa 1                                        | F: CAGCGTCATGGTCAGTCTGT<br>R: AGAAAACCGTGTGGCAGAGA          |
| Ppar $\gamma$  | Peroxisome proliferative activated<br>receptor gamma                       | F: CAAGAATACCAAAGTGCGATCAA<br>R: GAGCTGGGTCTTTTCAGAATAATAAG |
| aP2            | Fatty acid binding protein 4,<br>adipocyte                                 | F: GCGTGACTTCCACAAGAGTTTA<br>R: GCTTCTTCCTTTGGCTCATG        |
| Resistin       | Resistin                                                                   | F: CAACTCCCTGTTTCCAAATGC<br>R: GTCCAGCAATTTAAGCCAATGTT      |
| Leptin         | Leptin                                                                     | F: TTCACACACGCAGTCGGTAT<br>R: GCTGGTGAGGACCTGTTGAT          |
| Agt            | Angiotensinogen (serpin peptidase<br>inhibitor, clade A, member 8)         | F: CAGACAGCACCCCTACTTTTCAA<br>R: CAGACACCGAGATGCTGTTG       |
| C/EBP $\beta$  | CCAAT/enhancer binding protein<br>(C/EBP), beta                            | F: CAAGCTGAGCGACGAGTACA<br>R: GACAGCTGCTCCACCTTCTT          |
| Pde1b          | Phosphodiesterase 1B, Ca <sup>2+</sup> -<br>calmodulin dependent           | F: CGCTCTGAGGACCATTGTTT<br>R: TCCCATAGCCTGTCTCCAAG          |
| Igf1r          | Insulin-like growth factor I receptor                                      | F: GACAACTGCCCTGATATGCT<br>R: GAAGGAGACCTCCTGGAAGC          |
| Crat           | Carnitine acetyltransferase                                                | F: AACGCCTACAGAAGGGACTG<br>R: GGGCTGGAGTAGATGACCAC          |
| Med13          | Mediator complex subunit 13                                                | F: GCGAGATCAAAGACCTGGAA<br>R: AGGCCATTCTCCATACTCC           |
| ERR $\gamma$   | Estrogen-related receptor gamma                                            | F: ACTTGGCTGACCGAGAGTTG<br>R: GCAAGGGACAGTGTGGAGAA          |
| U36B4          | Ribosomal protein, large, P0                                               | F: AGATGCAGCAGATCCGCA<br>R: GTTCTTGCCCATCAGCACC             |
| Pde1b          | Phosphodiesterase 1B, Ca <sup>2+</sup> -<br>calmodulin dependent           | shRNA target sequence<br>CCTTCTTTAGATGTGGACGTA              |
